# Supplementary material for: Effect of Hemocoagulase on the Prevention of Bleeding after Percutaneous Renal Biopsy
Source: MDPI journal article supplement (doi:10.3390/toxins14030223), 2022-03-18
Supplement: s1 [file s1]

# Supplementary Materials: Effect of Hemocoagulase on the Prevention of Bleeding after Percutaneous Renal Biopsy

Kenta Torigoe, Ayuko Yamashita, Shinichi Abe, Kumiko Muta, Hiroshi Mukae and Tomoya Nishino

**Table S1.** Factors affecting post-biopsy Hb decline.

| Characteristic                     | $\rho$ | <i>p</i> -value |
|------------------------------------|--------|-----------------|
| Age (years)                        | −0.08  | 0.22            |
| BMI (kg/m <sup>2</sup> )           | −0.17  | <0.01           |
| Systolic BP (mmHg)                 | −0.15  | 0.03            |
| Diastolic BP (mmHg)                | 0.01   | 0.85            |
| Hb (g/dL)                          | 0.21   | <0.01           |
| Plt ( $\times 10^4/\mu\text{L}$ )  | −0.02  | 0.72            |
| PT-INR                             | −0.16  | 0.02            |
| APTT (sec)                         | −0.05  | 0.47            |
| TP (g/dL)                          | −0.04  | 0.59            |
| AST (U/L)                          | 0.01   | 0.84            |
| ALT (U/L)                          | 0.02   | 0.79            |
| BUN (mg/dL)                        | −0.09  | 0.16            |
| Cr (mg/dL)                         | −0.003 | 0.96            |
| eGFR (ml/min/1.73 m <sup>2</sup> ) | 0.01   | 0.94            |
| Urinary protein (g/gCr)            | −0.04  | 0.58            |
| Number of punctures                | −0.04  | 0.60            |

ALT, alanine aminotransferase; APTT, activated partial thromboplastin time; AST, aspartate aminotransferase; BMI, body mass index; BP, blood pressure; BUN, blood urea nitrogen; Cr, creatinine; eGFR, estimated glomerular filtration rate; Hb, hemoglobin; Plt, platelet; PT-INR, prothrombin time-international normalized ratio; TP, total protein.
